# Supplementary material for: Data Fusion Models for Assessing Adulteration in Butter Through Its Vibrational Spectroscopic Fingerprint
Source: Research Square preprint supplement (doi:10.21203/rs.3.rs-8703579/v1), 2026-02-11
Supplement: Supplementary file 1 [file ed3c8123fb84f9642b93964b.docx]

**DATA FUSION MODELS FOR ASSESSING ADULTERATION IN BUTTER THROUGH ITS VIBRATIONAL SPECTROSCOPIC FINGERPRINT**

*Supplementary Information*

*
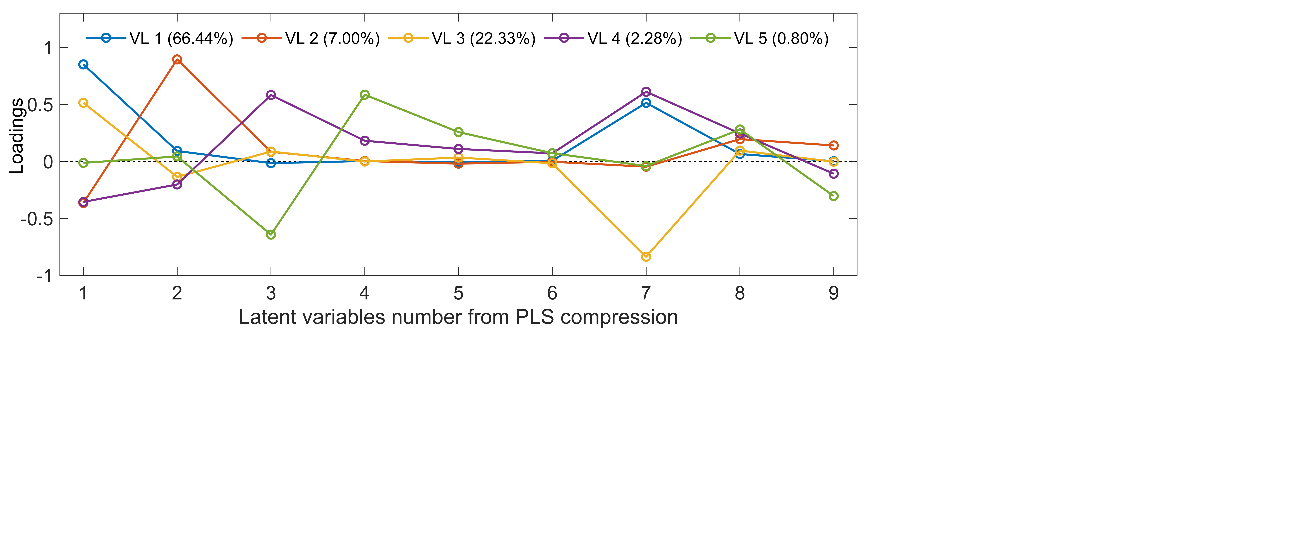
*

Figure 1SI. Loadings used in the model shown in Figure 5, after PLS compression procedure.


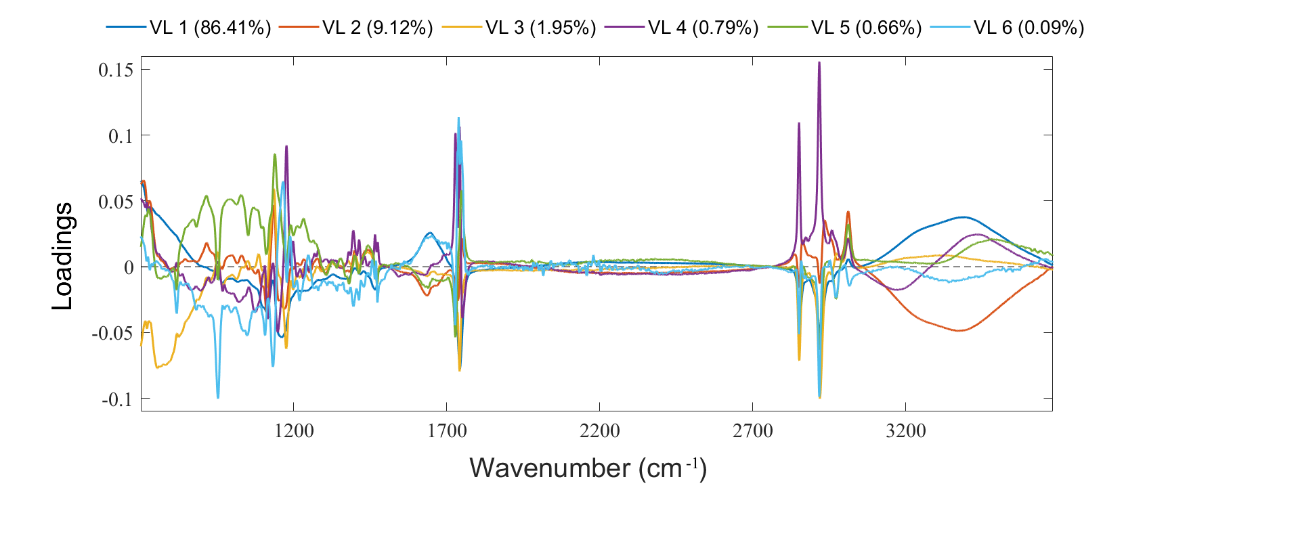


Figure 2SI. Loadings from the FT-IR dataset used in the final model shown in Figure 5, main text.


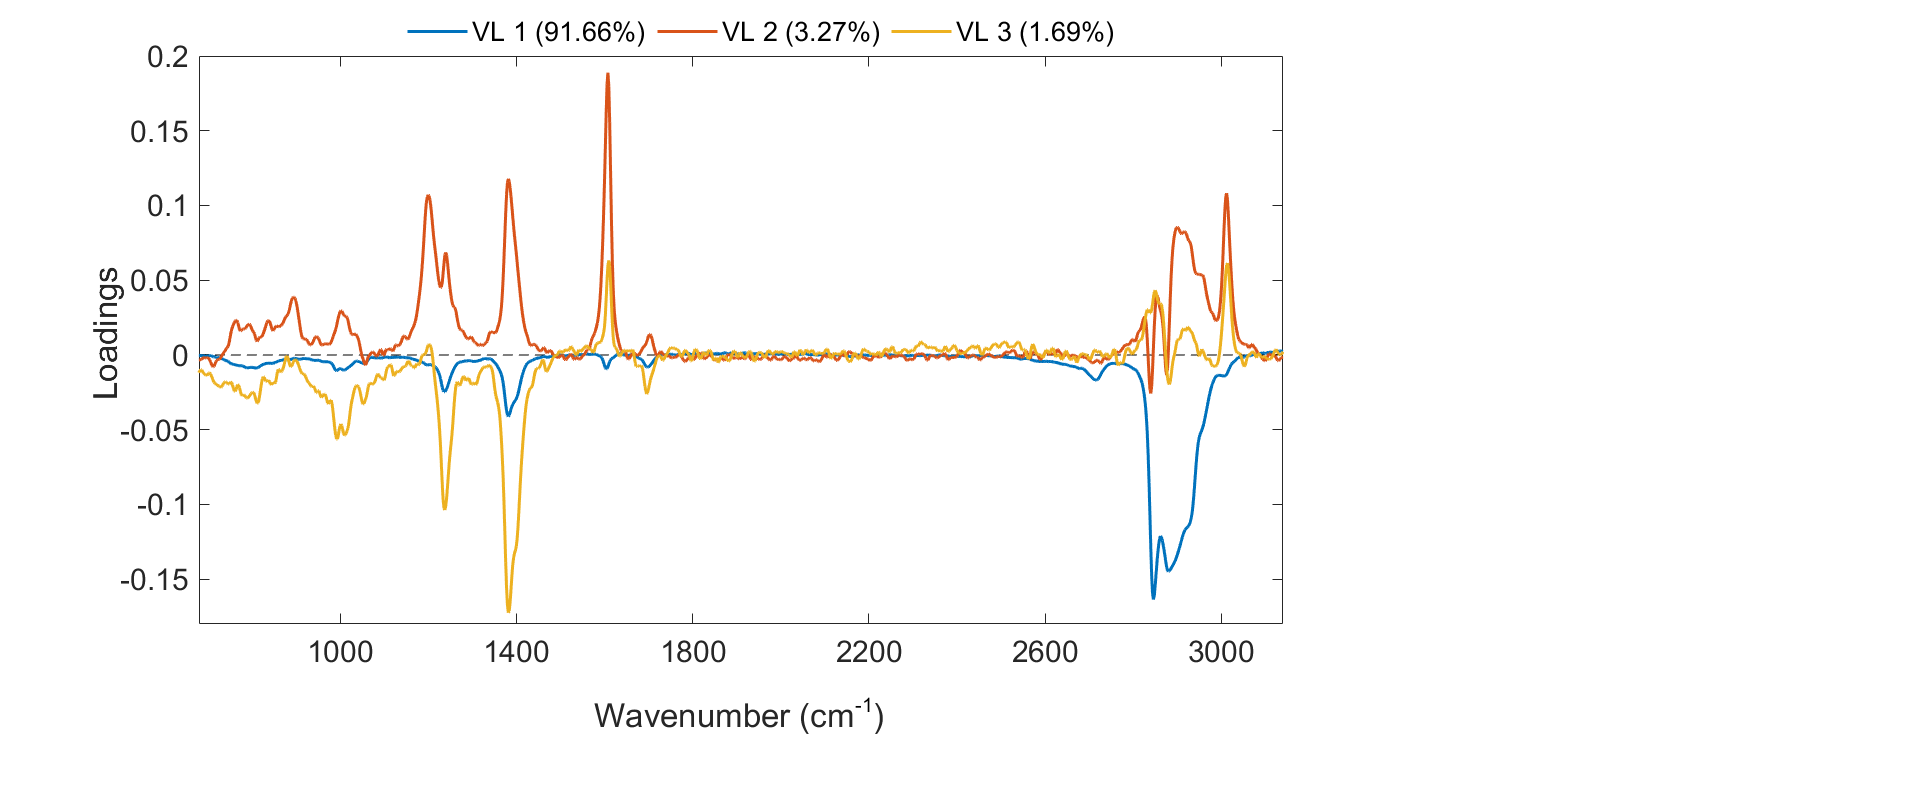


Figure 3SI. Loadings from the FT-Raman dataset used in the final model shown in Figure 5, main text.
